# Supplementary material for: Interannual and seasonal variability of the air-sea CO 2 exchange at Utö in the coastal region of the Baltic Sea
Source: Copernicus journal article supplement (doi:10.5194/egusphere-2024-628), 2024-03-18
Supplement: Supplementary file [file egusphere-2024-628-AC2-supplement.pdf]

Dear anonymous referee #1,

Thank you for your comments. They highly improve the quality of the publication, its scientific content, and the readability of the manuscript.

Below, the referee comments (shown in red) are answered point by point.

Title: Interannual and seasonal variability of the air-sea CO<sub>2</sub> exchange at Utö in the coastal region of the Baltic Sea Author(s): Martti Honkanen et al. MS No.: egusphere-2024-628 MS type: Research article “Interannual and seasonal variability of the air-sea CO<sub>2</sub> exchange at Utö in the coastal region of the Baltic Sea”

Hokanen et al. present an interesting article that seeks to quantify CO<sub>2</sub> flux between the coastal Baltic Sea waters and the overlying atmosphere across 5 years of observation. Using direct Eddy Covariance measurements across the sea surface from a land-based tower, interspersed with pCO<sub>2</sub> gradient measurements, that were incorporated into a wind-driven CO<sub>2</sub> flux parameterized model, the investigators were able to estimate annual CO<sub>2</sub> flux estimates and report both seasonal flux patterns and interannual variability. Ultimately, they are able to use 5 years of data to estimate CO<sub>2</sub> budget for the Archipelago Sea where Utö is located. Importantly, by taking advantage of the long-term environmental monitoring programs and assets at Utö (ICOS Atmospheric station, Marine Research Station, etc.), the authors were able to record from a suite of co-located instruments to 1) refine their pCO<sub>2</sub> gradient and flux measurements, 2) suggest plausible forcing factors to explain seasonal and inter-annual variation in pCO<sub>2</sub> in water and CO<sub>2</sub> flux direction and magnitude. I believe this work should make an important contribution to quantifying CO<sub>2</sub> flux in this region of the Baltic Sea and increase overall knowledge, dynamics, and forcing that take place in nearshore ocean ecosystems. The authors address the possible actions of biological, chemical, and physical factors to explain patterns of nutrient input and uptake, suggesting land-sea interaction and lateral transport of nutrients, combined with temperature and solar input as driving seasonal phytoplankton dynamics as a key driver of seasonal CO<sub>2</sub> drawdown in the water and wind as especially important in winter months for enhancing gas exchange.

#### Substantive Concerns

1) Although details of CO<sub>2</sub> flux measurements and modeling were detailed in Appendix A (Lines 430-478), I was surprised that some of this information was not included in the main manuscript, e.g., Methods and Results. Perhaps I am missing or misinterpreting (forgive me if that is the case), but it seems that the opportunity to use the direct comparison of EC measurements and the parameterized air-sea CO<sub>2</sub> flux results to help validate the flux model is being lost. Although parameterized air-sea CO<sub>2</sub> flux data are used for gap filling when accurate EC was disrupted by ships or otherwise not possible, is there a reason not to compare time periods when both EC and pCO<sub>2</sub> gradients were conducted to ground-truth model results? This seems especially important since EC, the direct measurement was only used 26% of the time (Line 161). In some sense, it seems that the EC was actually filling gaps for flux model results. Can you comment on this?

The discussion on the different flux determination methods is very important for the marine carbon and flux communities. The choice to place the information concerning the differences between the EC and parameterized fluxes in the Appendix was done in order to keep the main focus of the paper in the natural CO<sub>2</sub> flux variability.

In sense, the EC flux data was used for gap filling the parameterized fluxes. However, the EC data was used for the verification and fine tuning of the parametrization. We formed the site specific gas transfer velocity parameterization in order to confidently fill the gaps in the flux data, but left the deeper study of the gas transfer processes, with possible other auxiliary instrumentation, for the publications in future.

L462 A text showing the net exchange based solely on the EC flux will be included:

“The comparison between the annual budgets calculated using the parametrization and the EC method is not straightforward as the EC data set contains frequent gaps. However, the average annual air-sea CO<sub>2</sub> exchange using only the EC method was 19.6 gC m<sup>-2</sup> y<sup>-1</sup>, which is slightly lower than the estimate received using the parametrization and the EC data together.”

To not cause misconceptions, the fluxes for the shorter periods were not discussed here. In further publications, it will be possible to study the fluxes and the relevant processes during shorter periods when both flux methods are available.

2) Figure 9 contains especially important data describing 5 year’s of CO<sub>2</sub> fluxes observed at Utö, as measured by EC and estimated by parameterized models according to EQ 1 (line 44). However, I think it would be helpful to identify and differentiate EC values from the modeled value in Figure 9. The figure 9b is already crowded with information, and thus separating the different methods (EC and parametrization) for each year would overcomplicate the figure, especially when some months possibly contain very few data points. However, the 5-year monthly EC fluxes fits here, which might provide useful information on the relationship between the EC and the parametrization fluxes. Thus, the figure and its caption will be updated.

3) 2.2 Flow-through system (Lines 104-111). Is it possible to report the diameter of the 250m pipe that connects the submerged borehole pump (with inlet at 4.5m depth) to the manifold that feeds the instruments in the station? Although a flow rate of 55 l min<sup>-1</sup> is reported, it is not possible to determine the residence time of the water inside the transfer pipe.

The volume of the structure has been estimated to be 357 l, including all parts of the pumping system. The inner diameter of the long part of the water pipe is approximately 3.3 cm. The residence is approximately 6 min, depending on the flow rate.

The residence time will be added in L110:

“The residence time (on average 6 min) depends on the flow rate and is taken into account in the measurement time.”

Additionally, although there was frequent and automatic cleaning of the sensors and instrument hoses (Lines 110-111) there is no information on how frequently 250m pipe is and whether biofouling inside this pipe is likely to affect pCO<sub>2</sub> value measured at equilibrator inside the marine station.

Information on the pipe and pump changes will be added in L111:

“The submersible pump and the underwater pressure pipe are renewed annually.”

Lines 131-134: The authors do cite information about potential magnitude of possible pipe effect  
“The effect of the long inlet tube on the pCO<sub>2</sub> measurement at Utö has also been verified to be

small (Honkanen et al. 2021), but a brief summary statement about this potential measurement error would be helpful.

L133 will be modified to introduce more information on the system verification:

“The effect of the long inlet tube on the pCO<sub>2</sub> measurement at Utö was verified to be small (4.1  $\mu$ atm) by using several standalone sensors placed in the inlet location and in a tank connected to the manifold (Honkanen et al., 2021).

4) Figure A1 (page 31). Given the centrality of the gas transfer velocity estimates to CO<sub>2</sub> flux, which appear to have been relied on for 74% of observations, I am surprised that this key parameterization result is buried in the Appendix. Given the CO<sub>2</sub> flux is the basis for generation of annual CO<sub>2</sub> budgets, I wonder if the authors might consider incorporating this key finding and a discussion of it in the main text? If manuscript space/length is an issue, some of the environmental measurement figures (Figs 3-10) could be moved to Supporting Materials, but discussed and referenced in the main body of the text.

The site specific parametrization used in the analysis did not result in significantly different results than that would have gotten with using the common Wanninkhof (2014) parametrizations, stated in the Appendix. The figure A1 serves the purpose of verifying the flux parametrization.

#### Minor suggested edits/comments

Abstract (line 40), please define FCO<sub>2</sub> as CO<sub>2</sub> flux to avoid confusion with fugacity.

FCO<sub>2</sub> can be easily misinterpreted as fugacity, and thus we define the variable of the air-sea CO<sub>2</sub> flux as F<sub>as</sub>.

L40 will be modified:

“The CO<sub>2</sub> exchange between the atmosphere and the sea (F<sub>as</sub>)...”

L43 This also affects the equation in L43, which will be modified as:

“F<sub>as</sub> = k...”

It would be helpful to include the salinity range of the Archipelago Sea in description of study site. General comments about oceanographic and possibly land-sea interactions of the Gulf of Finland and Gulf of Bothnia with Archipelago Sea would be helpful to readers less familiar with region.

L91 A salinity range and information on the flow patterns will be added to the text:

“The surface salinity at Utö varies typically between 6-7 PSU (Laakso et al. 2018). The flow patterns in the Archipelago Sea contain large variations in time and space (Erkkilä and Kallio, 2004).”

L533 the reference will be added:

Erkkilä, A. and Kalliola, R.: Patterns and dynamics of coastal waters in multi-temporal satellite images: support to water quality monitoring in the Archipelago Sea, Finland, Estuarine, Coastal and Shelf Science, 60, 165–177, <https://doi.org/10.1016/j.ecss.2003.11.024/>, 2004.

#### Figures

Some figures are positioned in the main text (Figs. 1 and 2) but the other figs appear after the text and Appendix section on pages 23-28, these should be inserted at appropriate locations within the main text of the manuscript.

This seems to be a feature of the LaTeX template used. We kindly ask the Copernicus publications to look at this subject to direct the figures at their right places.

Figure 2 indicates that pH was one of the measurements made with the flow-through systems, but investigators did not seem to mention whether pH tracked pCO<sub>2</sub> and would be expected.

We are working on the pH data and will use it in upcoming publications. The data has required salinity considerations and other quality controlling. For this paper, we wanted to keep the attention on the net CO<sub>2</sub> exchange and thus excluded data not directly needed to the purpose. Preliminarily, the pH and pCO<sub>2</sub> at Utö show very strong anticorrelation. Due to this strong anticorrelation, the pH served as a quick glance on the quality control for the pCO<sub>2</sub> but this QC method was not done routinely here, and thus not introduced.

Figure 4 is missing units on the left side vertical axis.

Figure 4 has the right units (m) shown.

Figure 8 is missing vertical axis label.

Figure 8 is missing the unit (m/s), and this will be added to the left side of the figure.

Line 151 and elsewhere, (m.a.s.l.), please define acronym (meters above surface level?)

L151 The definition of acronym will be added:

“..., using a 9m tall micrometeorological flux tower, 12 m.a.s.l (meters above sea level), on the western shore of the island.”

Line 155, “The measured EC fluxes were corrected for the flux loss occurring in the system.” Please elaborate.

L155 The flux loss processes will be elaborated:

“..., which mostly originates from the attenuation of CO<sub>2</sub> molar fraction fluctuations in the tubing.”

Lines 207-209: “for the most part of the year” - edit to “for most of the year”.

“The year of 2018 was the warmest amongst the studied ones” – edit to “. . . warmest of those studied.”

L207-209 will be modified accordingly:

“The temperature remained up to approximately 2 °C below the 5-year average for most of the year, with the exception of September–October 2017, when the cooling was slightly lower than for other years. The year of 2018 was the warmest of those studied, in terms of the summer peak temperatures.”

## Discussion

Line 323: “as a source” – edit to “as a net source”

L323 will be clarified:

“The marine ecosystem at Utö acted as a net source of atmospheric carbon dioxide,...”

Lines 325-339: Authors might consider referring to allochthonous vs. autochthonous carbon. This is simply an observation, but in shallow well mixed estuaries, the benthos can be less disconnected from surface waters, with respect to its ability to mineralize organic carbon than it is in this system. In the current study location, strong thermoclines prevent mixing such that benthic respiration appears to have little or no effect compared with the photosynthetic drawdown of CO<sub>2</sub> due to summer phytoplankton blooms.

The benthic coupling is an important path way of the carbon. Unfortunately, it is not easily determined at the moment.

L331 will be modified:

“Organic carbon originates primarily from photosynthesis, either locally (autochthonous) or imported from elsewhere (allochthonous).”

In L341 a discussion on the mixing processes will be modified:

“The annual overturning of the water column plays an important factor bringing the carbon in the surface, to be released to the atmosphere. Similar effect can be generated by the wind-induced upwelling events, which can occasionally occur in the outer Archipelago (Lehmann et al, 2012).”

In L592 the reference will be added:

“Lehmann, A., Myrberg, K. and Höflich, K.: A statistical approach to coastal upwelling in the Baltic Sea based on the analysis of satellite data for 1990-2009, OCEANOLOGIA, 54, 369-393, <https://doi.org/10.5697/oc.54-3.369/>, 2012.

Lines 358-359: “The seawater pCO<sub>2</sub> in the summer 2017 remained extraordinarily high, compared to other years.” Think about rephrasing as “In comparison with other years, the seawater pCO<sub>2</sub> in the summer 2017 remained unusually high and values nearly exclusively above the multi-year mean.”

L358-359 were modified accordingly:

“In comparison with other years, the seawater pCO<sub>2</sub> in the summer 2017 remained unusually high and values nearly exclusively above the multi-year mean.”

Line 360: “. . . the sink fluxes were accordingly lower than other years.” Consider rephrasing to “. . . the sink fluxes were accordingly weaker than other years.”

L360: “. . . the sink fluxes were accordingly lower than other years.” will be reworded to “. . . the sink fluxes were accordingly weaker than other years.”

Lines 363- 364: “The mixing of CO<sub>2</sub> rich to the surface may have diluted the drawdown surface, thus decreasing the negative fluxes in summer.” Consider changing “decreasing” to “lessening”.

L363 decreasing will be reworded to lessening.

Line 366: “Due to this, the sea was able to release more carbon dioxide . . . .” Consider rephrasing to “For this reason, we believe the sea was able to release more carbon dioxide . . . .”

L366: “Due to this, the sea was able to release more carbon dioxide . . . .” will be replaced to “For this reason, we believe the sea was able to release more carbon dioxide . . . .”

Best regards,

Martti Honkanen
